# Supplementary material
Source: publisher figshare collection journal article supplement (https://acs.figshare.com/ndownloader/files/17417339)

# Supporting Information

## **Synthesis of Four Illudalane Sesquiterpenes Utilizing a One-Pot Diels-Alder/Oxidative Aromatization Sequence**

Miao-Miao Xun, Yunli Bai, Yanhong Wang, Zhiyong Hu, Kai Fu, Wenbing Ma,  
Changchun Yuan\*

*National Demonstration Center for Experimental Chemical Engineering Comprehensive Education,  
School of Chemical Engineering and Technology, North University of China, Taiyuan 030000, P.R.  
China*

## Table of Contents

|                                                                          |     |
|--------------------------------------------------------------------------|-----|
| General Information.....                                                 | S3  |
| Experimental Procedures.....                                             | S4  |
| Gram-scale synthesis of echinolactone A (2).....                         | S11 |
| Asymmetric synthesis of radulactone (3) .....                            | S14 |
| Tables S1-S8 (NMR comparison between synthetic and natural samples)..... | S20 |
| X-Ray Crystallographic Data for echinolactone A (2) .....                | S28 |
| References.....                                                          | S31 |
| Spectra for Compounds.....                                               | S32 |

## General Information

All reactions were carried out under an argon atmosphere with dry solvents under anhydrous conditions, unless otherwise noted. Dichloromethane (DCM) and toluene were distilled from calcium hydride under argon; Tetrahydrofuran was distilled from sodium-benzophenone. All the chemicals were purchased commercially and used without further purification, unless otherwise stated. Flash chromatography was performed using silica gel (200-300 mesh). Reactions were monitored by thin layer chromatography (TLC). Visualization was achieved under a UV lamp (254 nm and 365 nm),  $I_2$  and by developing the plates with *p*-anisaldehyde or phosphomolybdic acid.  $^1H$  and  $^{13}C$  NMR were recorded on Bruker DRX-400 MHz and Bruker DRX-600 MHz NMR spectrometer with TMS as the internal standard and were calibrated using residual undeuterated solvent as an internal reference ( $CDCl_3$ :  $^1H$  NMR = 7.26,  $^{13}C$  NMR = 77.16;  $C_6D_6$ :  $^1H$  NMR = 7.28,  $^{13}C$  NMR = 127.82). The following abbreviations were used to explain the multiplicities: s = singlet, d = doublet, t = triplet, q = quartet, m = multiplet, b = broad. Coupling constants ( $J$ ) are reported in Hertz (Hz). High-resolution mass spectra (HRMS) were recorded on a FTMS-7 spectrometers and are reported as  $m/z$  (relative intensity). Accurate masses are reported for the molecular ion  $[M + Na]^+$ ,  $[M + H]^+$ . Infrared (IR) spectra were recorded on a NEXUS 670 FT-IR Fourier transform infrared spectrophotometer and are reported in wavenumbers ( $cm^{-1}$ ). Single-crystal structure of compound were measured on Bruker D8 venture.

## Experimental Procedures

### Method A for the Preparation of Compound 8

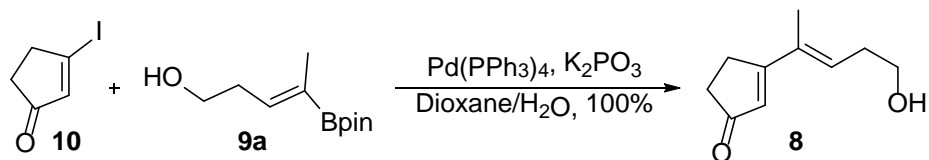

Known compound **10** can be commercially acquired or be prepared in one step from commercially available 1,3-cyclopentanedione on the basis of known literature.<sup>[1]</sup> To a solution of compound **10** (1.95 g, 9.40 mmol) and compound **9a** (a known compound,<sup>[2]</sup> 4.00 g, 18.86 mmol) in dioxane (75 mL) and water (15 mL) was added  $\text{Pd(PPh}_3)_4$  (543 mg, 0.47 mmol) and  $\text{K}_3\text{PO}_4$  (6.00 g, 28.27 mmol) in order at rt. Then the reaction was allowed to heat to 60 °C stirring for 5 h and 80 °C stirring for 2 h, before it was filtered through a pad of Celite and washed with EtOAc. The layers were diluted with  $\text{H}_2\text{O}$  (50 mL) and separated. Then the aqueous layer was extracted with EtOAc (3 × 60 mL). The combined organic layers were dried over  $\text{Na}_2\text{SO}_4$ , filtered and concentrated under reduced pressure. The residue was purified by flash column chromatography on silica gel (1 : 1 petroleum ether-EtOAc) to furnish compound **8** (1.56 g, 100%) as a pale yellow solid.

### Method B for the Preparation of Compound 8

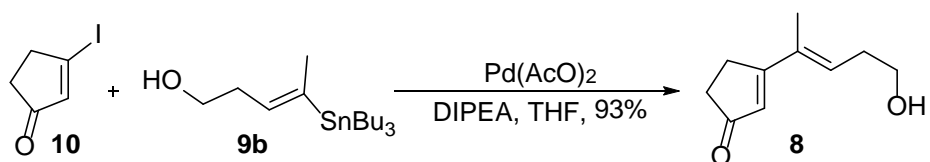

To a solution of compound **10** (500 mg, 2.40 mmol) and compound **9b** (a known

compound,<sup>[3]</sup> 1.60 g, 4.25 mmol) in THF (25 mL) was added Pd(AcO)<sub>2</sub> (162 mg, 0.72 mmol) and DIPEA (0.21 mL, 162 mg, 1.25 mmol) in order at rt. Then the reaction was allowed to stir for 5 h at this temperature, before it was concentrated under reduced pressure. The residue was purified by flash column chromatography on silica gel (1 : 1 petroleum ether-EtOAc) to furnish compound **8** (445.2 mg, 93%) as a pale yellow solid.

Mp = 72.3 – 73.5 °C;

IR (thin film): 3418, 2925, 1672, 1626, 1574, 1441, 1298, 1195, 1048, 838 cm<sup>-1</sup>;

<sup>1</sup>H NMR (600 MHz, CDCl<sub>3</sub>) δ 6.18 (t, *J* = 7.2 Hz, 1H), 6.06 (s, 1H), 3.77 (dd, *J* = 12.0, 6.6 Hz, 2H), 2.79 – 2.78 (m, 2H), 2.52 (q, *J* = 7.2 Hz, 2H), 2.48 – 2.37 (m, 2H), 1.93 (s, 3H), 1.88 (t, *J* = 5.4 Hz, 1H);

<sup>13</sup>C NMR (150 MHz, CDCl<sub>3</sub>) δ 210.2, 175.8, 134.0, 132.4, 127.4, 61.8, 35.1, 32.4, 27.7, 14.6;

HRMS (ESI): *m/z* calcd for C<sub>10</sub>H<sub>14</sub>NaO<sub>2</sub> [M+Na]<sup>+</sup> 189.0886 found 189.0880.

### Procedure for the Preparation of Compound **6**

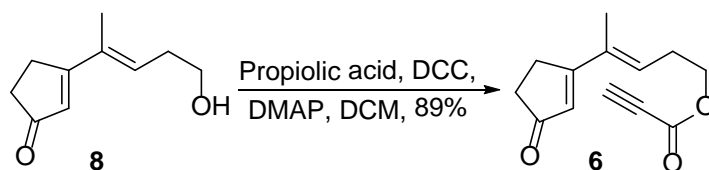

To a solution of compound **8** (3.50 g, 21.07 mmol) in dry DCM (35 mL) was added propiolic acid (2.00 mL, 2.28 g, 32.50 mmol) at 0 °C and the resulting mixture was stirred for 30 min at the same temperature. The mixture of DCC (8.70 g, 42.17 mmol) and DMAP (51 mg, 0.42 mmol) in DCM (35 mL) was added to the above solution at

0 °C. After stirring for another 1.5 h at 0 °C, it was filtered through a pad of Celite to remove the solid and washed with DCM. The organic layer were concentrated under reduced pressure. The residue was purified by flash column chromatography on silica gel (2 : 1 petroleum ether-EtOAc) to furnish compound **6** (4.07 g, 89%) as a white solid.

Mp = 95.1 – 96.8 °C;

IR (thin film): 3153, 3063, 2923, 2844, 2103, 1708, 1632, 1576, 1475, 1429, 1241, 1200, 1076, 989, 643 cm<sup>-1</sup>;

<sup>1</sup>H NMR (600 MHz, CDCl<sub>3</sub>) δ 6.10 (s, 1H), 6.08 (t, *J* = 7.2 Hz, 1H), 4.31 (t, *J* = 6.6 Hz, 2H), 2.91 (s, 1H), 2.81 – 2.75 (m, 2H), 2.65 (q, *J* = 6.6 Hz, 2H), 2.48 – 2.46 (m, 2H), 1.94 (s, 3H);

<sup>13</sup>C NMR (150 MHz, CDCl<sub>3</sub>) δ 209.8, 175.0, 152.7, 134.8, 129.8, 128.1, 75.3, 74.6, 64.8, 35.1, 28.2, 27.7, 14.6;

HRMS (ESI): *m/z* calcd for C<sub>13</sub>H<sub>14</sub>NaO<sub>3</sub> [M+Na]<sup>+</sup> 241.0835 found 241.0835.

### Procedure for the Preparation of Compound **5**

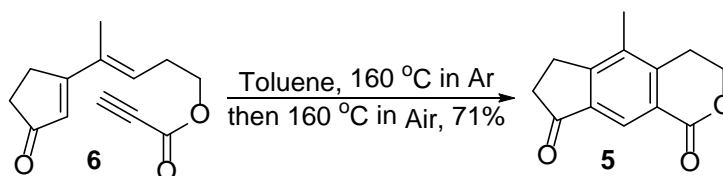

A solution of compound **6** (170 mg, 0.78 mmol) in toluene (4.0 mL) was heated at 160 °C in a 15 mL sealed-tube for 15 h under argon atmosphere. Then the reaction was cooled to room temperature and toluene (2.0 mL) was added, before it was fully contacted with air. Adherence the mixture was heated to 160 °C again and stirred for another 15 h in this

sealed-tube, before it was concentrated under reduced pressure. The residue was purified by flash column chromatography on silica gel (1 : 1 petroleum ether-EtOAc) to furnish compound **5** (119.6 mg, 71%) as a pale yellow solid.

Mp = 203.9 – 204.5 °C;

IR (thin film): 2923, 1723, 1606, 1432, 1402, 1290, 1259, 1197, 1158, 1100, 957, 780  $\text{cm}^{-1}$ ;

$^1\text{H}$  NMR (600 MHz,  $\text{CDCl}_3$ )  $\delta$  8.42 (s, 1H), 4.54 (t,  $J$  = 6.0 Hz, 2H), 3.11 (t,  $J$  = 12.0 Hz, 2H), 3.08 (t,  $J$  = 6.0 Hz, 2H), 2.76 – 2.74 (m, 2H), 2.34 (s, 3H);

$^{13}\text{C}$  NMR (150 MHz,  $\text{CDCl}_3$ )  $\delta$  205.8, 165.0, 158.7, 143.8, 136.2, 133.2, 125.4, 124.5, 66.4, 36.3, 25.9, 25.7, 14.3;

HRMS (ESI):  $m/z$  calcd for  $\text{C}_{13}\text{H}_{12}\text{NaO}_3$   $[\text{M}+\text{Na}]^+$  239.0679 found 239.0677.

### Procedure for the Preparation of Natural product Echinolactone A (**2**)

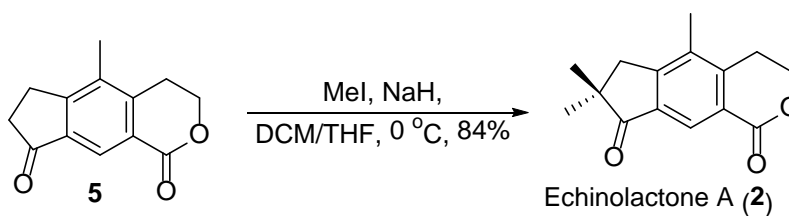

To a suspension of NaH (60% suspension in mineral oil, 110.4 mg, 2.76 mmol) in dry THF (2 mL) was added the solution of compound **5** (50 mg, 0.23 mmol) in dry DCM (1 mL) at 0 °C. Then the mixture was allowed to stir at room temperature for 20 min, followed re-cooling to 0 °C and by addition of excess MeI drop by drop. This mixture was then stirred for a further 2 h and diluted with dry THF (10 mL). Then the reaction mixture was droply added to the solution of HCl (5 mL, 1 M in  $\text{H}_2\text{O}$ ) and  $\text{H}_2\text{O}$  (10 mL) at

0 °C, followed by concentration under reduced pressure in order to remove THF. The aqueous layer was extracted with DCM (10 × 20 mL). The organic layers were combined, dried over Na<sub>2</sub>SO<sub>4</sub>, filtered and concentrated under reduced pressure. The residue was purified by flash column chromatography on silica gel (2 : 1 petroleum ether-EtOAc) to furnish natural product echinolactone A (**2**) (47.3 mg, 84%) as a white solid.

Mp = 218.5 – 218.6 °C;

IR (thin film): 2925, 1720, 1599, 1468, 1386, 1266, 1292, 1211, 1174, 1087, 790 773 cm<sup>-1</sup>;

<sup>1</sup>H NMR (600 MHz, CDCl<sub>3</sub>) δ 8.41 (s, 1H), 4.53 (t, *J* = 6.0 Hz, 2H), 3.07 (t, *J* = 6.0 Hz, 2H), 2.96 (s, 2H), 2.30 (s, 3H), 1.25 (s, 6H);

<sup>13</sup>C NMR (100 MHz, CDCl<sub>3</sub>) δ 210.2, 165.0, 155.9, 144.0, 134.4, 133.2, 125.5, 125.0, 66.4, 45.7, 42.6, 25.9, 25.4, 14.3;

HRMS (ESI): *m/z* calcd for C<sub>15</sub>H<sub>16</sub>NaO<sub>3</sub> [M+Na]<sup>+</sup> 267.0992 found 267.0990.

### Procedure for the Preparation of Natural product (±)-Radulactone (**3**)

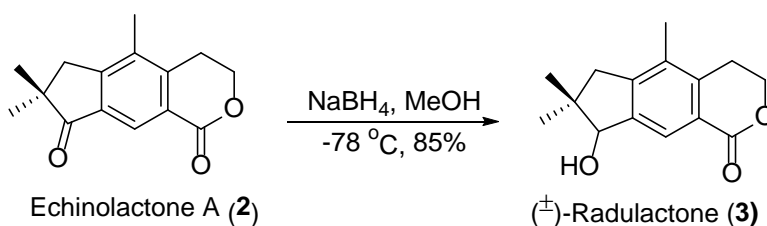

To a solution of echinolactone A (**2**) (10 mg, 0.04 mmol) in MeOH (1 mL) was added NaBH<sub>4</sub> (2.3 mg, 0.06 mmol) at -78 °C. After stirring for 5 h at -78 °C, the resulting mixture was diluted with MeOH (5 mL) at this temperature. Then the reaction mixture was dropwise added to the saturated aqueous NH<sub>4</sub>Cl (10 mL) at 0 °C, followed by





temperature. To this mixture was added echinolactone A (**2**) (42.9 mg, 0.18 mmol) in toluene (2.0 mL) followed by addition of concentrated HCl (3.2 mL). After stirring overnight at room temperature, it was filtered through a pad of Celite to remove the solid and washed with EtOAc. The organic layers were combined, dried over Na<sub>2</sub>SO<sub>4</sub>, filtered and concentrated under reduced pressure. The residue was purified by flash column chromatography on silica gel (8 : 1 petroleum ether-EtOAc) to furnish natural product granulolactone (**1**) (39.6 mg, 96%) as a white solid.

Mp = 117.8 – 119.2 °C;

IR (thin film): 2964, 2924, 1722, 1610, 1467, 1446, 1396, 1332, 1285, 1264, 1185, 1156, 1085, 1035, 936, 795 cm<sup>-1</sup>;

<sup>1</sup>H NMR (600 MHz, CDCl<sub>3</sub>) δ 7.78 (s, 1H), 4.49 (t, *J* = 6.0 Hz, 2H), 2.94 (t, *J* = 6.0 Hz, 2H), 2.76 (s, 2H), 2.71 (s, 2H), 2.18 (s, 3H), 1.15 (s, 6H);

<sup>13</sup>C NMR (100 MHz, CDCl<sub>3</sub>) δ 166.4, 149.5, 142.6, 136.3, 130.9, 124.3, 123.6, 66.9, 47.6, 47.3, 39.8, 29.0, 25.2, 15.4;

HRMS (ESI): *m/z* calcd for C<sub>15</sub>H<sub>18</sub>NaO<sub>2</sub> [M+Na]<sup>+</sup> 253.1199 found 253.1200.

#### Procedure for the Preparation of Natural product Riparol (**4**)

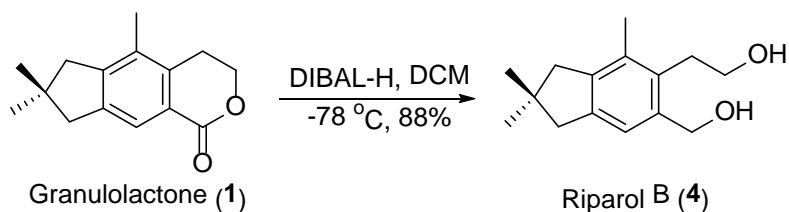

To a solution of granulolactone (**1**) (24 mg, 0.104 mmol) in DCM (1 mL) was slowly added DIBAL-H (0.3 mL, 0.45 mmol, 1.5 M in toluene) at -78 °C. Then the reaction was

stirred for 1 h at this temperature, before it was slowly added to saturated Rochelle salt (10 mL) at 0 °C. After stirred for another 1 h, the layers were separated and the aqueous layer was extracted with DCM (10 × 20 mL). The combined organic layers were dried over Na<sub>2</sub>SO<sub>4</sub>, filtered and concentrated under reduced pressure. The residue was purified by flash column chromatography on silica gel (1 : 1, petroleum ether-EtOAc) to furnish natural product riparol (**4**) (21.4 mg, 88%) as a white solid.

Mp = 154.2 – 154.8 °C;

IR (thin film): 3225, 2961, 2926, 1460, 1429, 1384, 1368, 1261, 1023, 900, 866, 754 cm<sup>-1</sup>;

<sup>1</sup>H NMR (600 MHz, CDCl<sub>3</sub>) δ 7.01 (s, 1H), 4.61 (s, 2H), 3.86 (t, *J* = 6.0 Hz, 2H), 3.02 (t, *J* = 6.0 Hz, 2H), 2.96 (b s, 2H), 2.72 (s, 2H), 2.67 (s, 2H), 2.20 (s, 3H), 1.15 (s, 6H);

<sup>13</sup>C NMR (100 MHz, CDCl<sub>3</sub>) δ 143.6, 141.7, 138.1, 133.4, 133.2, 124.2, 64.5, 61.8, 48.0, 47.4, 39.5, 31.8, 29.4, 16.2;

HRMS (ESI): *m/z* calcd for C<sub>15</sub>H<sub>23</sub>O<sub>2</sub> [M+H]<sup>+</sup> 235.1693 found 235.1695.

## Gram-scale synthesis of echinolactone A (**2**)

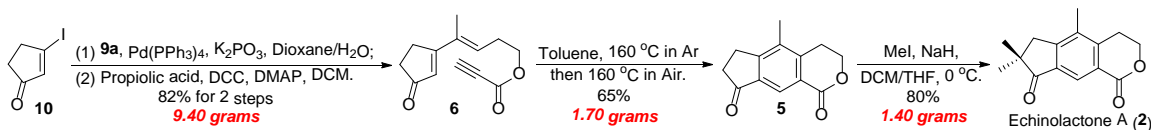

To a solution of compound **10** (9.40 g, 45.20 mmol) and compound **9a** (19.2 g, 90.40 mmol) in dioxane (375 mL) and water (75 mL) was added Pd(PPh<sub>3</sub>)<sub>4</sub> (2.60 g, 2.26 mmol) and K<sub>3</sub>PO<sub>4</sub> (29.0 g, 135.6 mmol) in order at rt. Then the reaction was allowed to heat to

70 °C stirring for 4 h, before it was filtered through a pad of Celite and washed with EtOAc. The layers were diluted with H<sub>2</sub>O (150 mL) and separated. Then the aqueous layer was extracted with EtOAc (8 × 200 mL). The combined organic layers were dried over Na<sub>2</sub>SO<sub>4</sub>, filtered and concentrated under reduced pressure. The residue was purified by flash column chromatography on silica gel (1 : 1 petroleum ether-EtOAc) to furnish crude compound **8** as a pale yellow solid. To a solution of the above crude compound **8** in dry DCM (85 mL) was added propiolic acid (4.70 mL, 5.35 g, 76.7 mmol) at 0 °C and the resulting mixture was stirred for 30 min at the same temperature. The mixture of DCC (21.0 g, 102.3 mmol) and DMAP (122 mg, 1.00 mmol) in DCM (85 mL) was added to the above solution at 0 °C. After stirring for another 4 h at 0 °C, it was filtered through a pad of Celite to remove the solid and washed with DCM. The organic layer were concentrated under reduced pressure. The residue was purified by flash column chromatography on silica gel (2 : 1 petroleum ether-EtOAc) to furnish compound **6** (8.0 g, 82% for two steps) as a white solid.

A solution of compound **6** (1.70 g, 7.79 mmol) in toluene (40 mL) was heated at 160 °C in a 150 mL sealed-tube for 15 h under argon atmosphere. Then the reaction was cooled to room temperature and toluene (20 mL) was added, before it was fully contacted with air. Adherence the mixture was heated to 160 °C again and stirred for another 15 h in this sealed-tube, before it was concentrated under reduced pressure. The residue was purified by flash column chromatography on silica gel (1 : 1 petroleum ether-EtOAc) to furnish compound **5** (1.09 g, 65%) as a brown solid.

To a suspension of NaH (60% suspension in mineral oil, 5.18 g, 129.49 mmol) in dry THF (60 mL) was added the solution of compound **5** (1.4 g, 6.47 mmol) in dry DCM (20 mL) at 0 °C. Then the mixture was allowed to stir at room temperature for 20 min, followed re-cooling to 0 °C and by addition of excess MeI (4 mL, 9.2 g, 64.7 mmol) drop by drop. This mixture was then stirred for a further 4 h and diluted with dry THF (20 mL). Then the reaction mixture was droply added to the solution of HCl (150 mL, 1 M in H<sub>2</sub>O) at 0 °C, followed by concentration under reduced pressure in order to remove THF. The aqueous layer was extracted with DCM (5 × 120 mL) and EtOAc (5 × 120 mL). The organic layers were combined, dried over Na<sub>2</sub>SO<sub>4</sub>, filtered and concentrated under reduced pressure. The residue was purified by flash column chromatography on silica gel (2 : 1 petroleum ether-EtOAc) to furnish natural product echinolactone A (**2**) (1.27 g, 80.3%) as a white solid.

## Asymmetric synthesis of radulactone (3)

### Method A (CBS reduction):

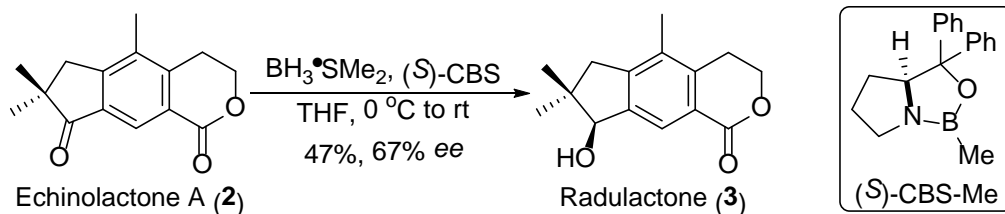

(+)-Radulactone (**3**) can be synthesized according to the known procedure.<sup>4</sup> To a solution of  $\text{BH}_3 \cdot \text{SMe}_2$  (0.27 mL, 2 M in THF, 0.533 mmol) and (*S*)-CBS-Me (0.12 mL, 1 M in toluene, 0.123 mmol) in THF (4 mL) at 0 °C was added echinolactone A (**2**) (100 mg, 0.41 mmol) in THF (6 mL). The reaction mixture was allowed to warm to rt and stirred overnight. The reaction was quenched with  $\text{H}_2\text{O}$  (10 mL) carefully, then diluted with EtOAc (30 mL), washed with 1 N HCl aqueous solution (15 mL), and extracted with EtOAc (5 × 30 mL). The combined organic layer was washed with brine (30 mL), dried over  $\text{NaSO}_4$  and concentrated under reduced pressure. The residue was purified by flash column chromatography on silica gel (2 : 1 petroleum ether-EtOAc) to recycle echinolactone A (**2**) (9.45 mg, 9%) and furnish (+)-radulactone (**3**) (47.6 mg, 47% yield, 52% brsm, *ee* = 67%) as a colorless oil.  $[\alpha]_{\text{D}}^{26} +17.5$  (c 0.3,  $\text{CHCl}_3$ ). The enantiomeric excess was determined by chiral HPLC analysis on Chiralpak IG-3 column (MTBE(0.1%DEA):EtOH=50:50, flow rate = 1 mL/min,  $\lambda$  = 254 nm),  $t_{\text{R}}$  = 1.03 min (*minor*),  $t_{\text{R}}$  = 2.11 min (*major*).

## HPLC charts for Method A

### HPLC Report

**Sample Name** RS  
**Injection date:** 8/19/2019 4:27:45 PM  
**Injection Volume** 1.000  
**Acq. method:** Chiral.M  
**Column name:** CHIRALPAK IG-3 4.6\*50mm 3um  
**Method Comment:** Mobile phase :MTBE(0.1%DEA):EtOH=50:50  
Flow :1.0mL/min  
Temperature :25  
**Instrument:** 1260

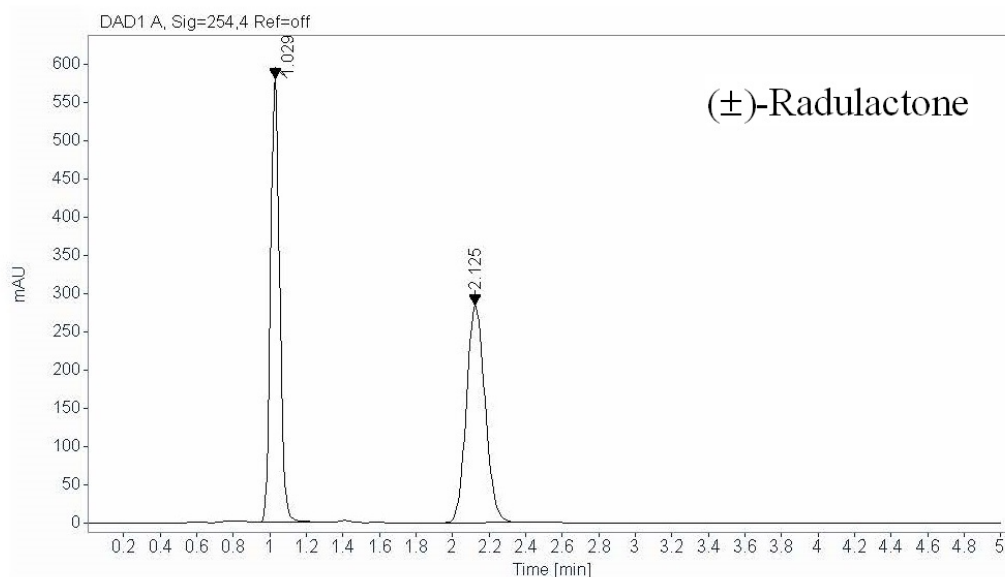

Signal: DAD1 A, Sig=254,4 Ref=off

| RT [min] | Area    | Height | Area% |
|----------|---------|--------|-------|
| 1.03     | 2019.45 | 584.83 | 49.94 |
| 2.12     | 2024.12 | 284.73 | 50.06 |

## HPLC charts for Method A

### HPLC Report

**Sample Name** D  
**Injection date:** 8/19/2019 4:21:58 PM  
**Injection Volume** 1.000  
**Acq. method:** Chiral.M  
**Column name:** CHIRALPAK IG-3 4.6\*50mm 3um  
**Method Comment:** Mobile phase :MTBE(0.1%DEA):EtOH=50:50  
Flow :1.0mL/min  
Temperature :25  
**Instrument:** 1260

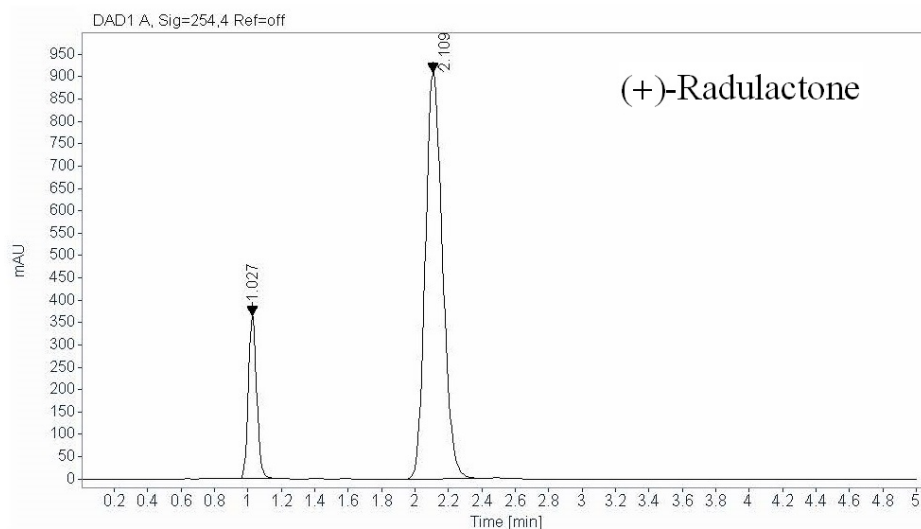

Signal: DAD1 A, Sig=254,4 Ref=off

| RT [min] | Area    | Height | Area% |
|----------|---------|--------|-------|
| 1.03     | 1275.47 | 369.90 | 16.36 |
| 2.11     | 6518.86 | 910.76 | 83.64 |



### Method B (asymmetric hydrogenation):

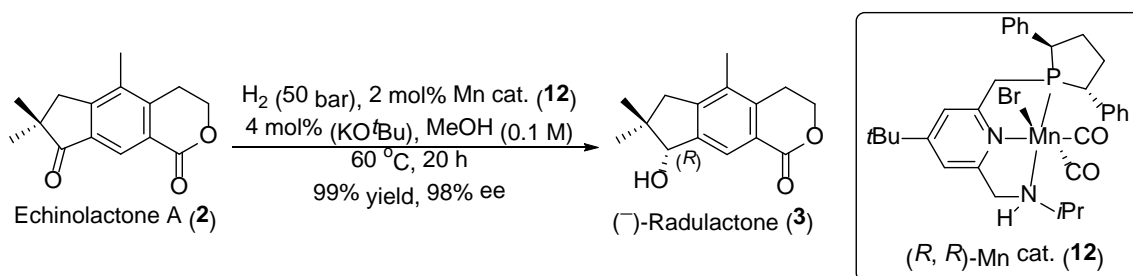

According to the known reference,<sup>5</sup> in a glove box, a 125-mL Parr autoclave was charged with Mn complex (**12**, 2.6 mg, 0.004 mmol), KO<sup>t</sup>Bu (0.9 mg, 0.008 mmol), MeOH (2 mL) and echinolactone A (**2**, 48.8 mg, 0.2 mmol). The reaction vessel was sealed and then purged three times with hydrogen gas. The pressure of H<sub>2</sub> in the autoclave was finally adjusted to 50 bar and the vessel was stirred at 60 °C for 20 h. The residual H<sub>2</sub> was released carefully in a hood and the reaction mixture was concentrated and the residue was purified by column chromatography on silica gel to afford the pure chiral (-)-radulactone (**3**) as a white solid (49.0 mg, 99% yield, 98% ee).  $[\alpha]_{\text{D}}^{25} -30$  (c 0.5, CHCl<sub>3</sub>). The enantiomeric excess was determined by chiral HPLC analysis on Chiralpak OJ-3 column (hexane : isopropanol = 85 : 15, flow rate = 1 mL/min,  $\lambda$  = 254 nm),  $t_{\text{R}}$  = 14.1 min (*major*),  $t_{\text{R}}$  = 18.4 min (*minor*).

## HPLC charts for Method B

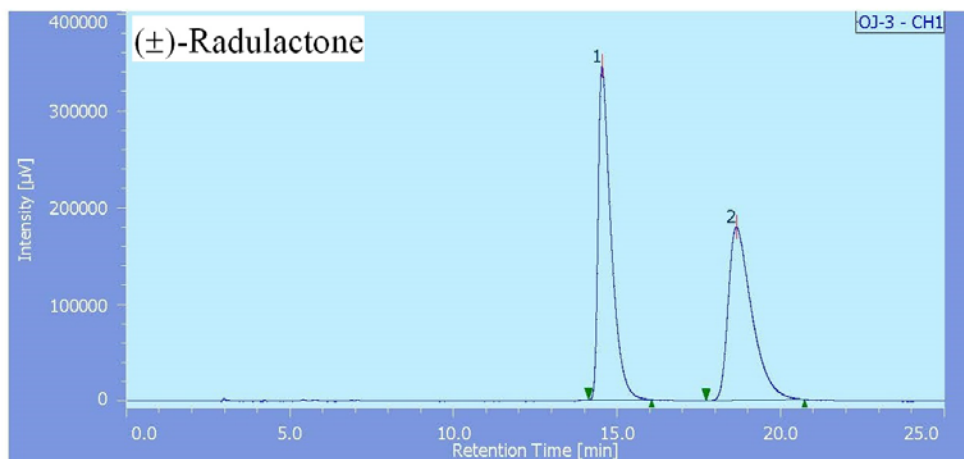

### Chromatogram Information

User Name Administrator  
 Date Modified 2019/8/16 13:09:57  
 Description  
 HPLC System Name HPLC  
 Injection Date 2019/8/16 12:36:03  
 Volume 1.00 [ $\mu L$ ]  
 Sample Number 1  
 Project Name zhanglinli  
 Acquisition Time 59.0 [min]  
 Acquisition Sequence zll805-16-105-rac-OJ-3-2  
 Control Method 85 15 1 ml min 254  
 Peak ID Table  
 Calibration Method  
 Additional Information

### Channel & Peak Information Table

Chromatogram Name OJ-3-CH1  
 Sample Name  
 Channel Name CH1  
 Sampling Interval 500 [msec]  
 Peak Method (Manual)

### Formula

### Decision

| # | Peak Name | CH | tR [min] | Area [ $\mu V \cdot sec$ ] | Height [ $\mu V$ ] | Area%  | Height% | Quantity | NTP  | Resolution | Symmetry Factor | Warning |
|---|-----------|----|----------|----------------------------|--------------------|--------|---------|----------|------|------------|-----------------|---------|
| 1 | Unknown   | 1  | 14.542   | 9455547                    | 344465             | 51.230 | 65.775  | N/A      | 7186 | 4.196      | 2.037           |         |
| 2 | Unknown   | 1  | 18.650   | 9001413                    | 179239             | 48.770 | 34.225  | N/A      | 3410 | N/A        | 1.733           |         |

## HPLC charts for Method B

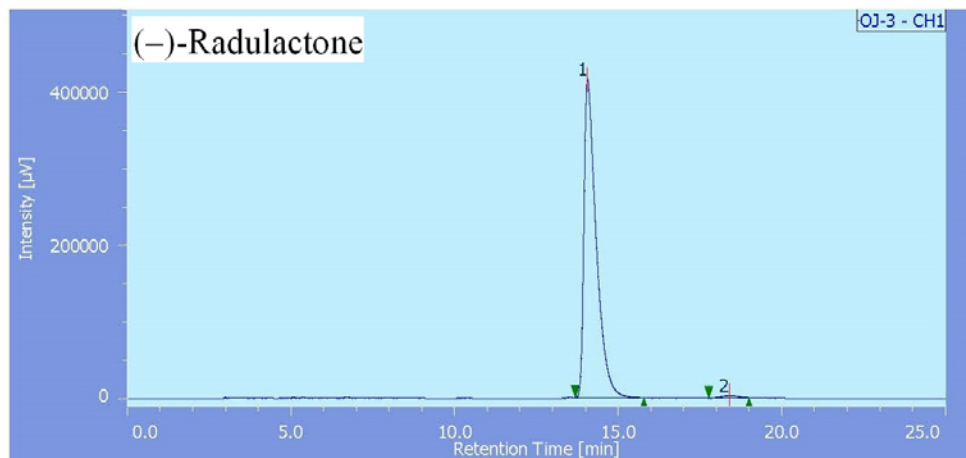

### Chromatogram Information

User Name Administrator  
 Date Modified 2019/8/15 17:07:37  
 Description  
 HPLC System Name HPLC  
 Injection Date 2019/8/15 16:38:47  
 Volume 1.00 [ $\mu L$ ]  
 Sample Number 1  
 Project Name zhanglinli  
 Acquisition Time 59.0 [min]  
 Acquisition Sequence zll805-16-105  
 Control Method 85 15 1 ml min 254  
 Peak ID Table  
 Calibration Method  
 Additional Information

### Channel & Peak Information Table

Chromatogram Name OJ-3-CH1  
 Sample Name  
 Channel Name CH1  
 Sampling Interval 500 [msec]  
 Peak Method (Manual)  
 Formula  
 Decision

| # | Peak Name | CH | tR [min] | Area [ $\mu V \cdot sec$ ] | Height [ $\mu V$ ] | Area%  | Height% | Quantity | NTP  | Resolution | Symmetry Factor | Warning |
|---|-----------|----|----------|----------------------------|--------------------|--------|---------|----------|------|------------|-----------------|---------|
| 1 | Unknown   | 1  | 14.067   | 10787544                   | 415725             | 99.005 | 99.320  | N/A      | 7556 | 5.068      | 2.068           |         |
| 2 | Unknown   | 1  | 18.400   | 108393                     | 2848               | 0.995  | 0.680   | N/A      | 4755 | N/A        | 0.998           |         |

**Table S1. Comparison of  $^1\text{H}$  NMR data of natural granulolactone (1)<sup>[6]</sup> (400 MHz)  
with those of synthetic granulolactone (1) (600 MHz)**

| Position | Natural, 400 MHz, $\text{CDCl}_3$ ,<br>$\delta_{\text{H}}$ (mult. $J$ in Hz) | Synthetic, 600 MHz, $\text{CDCl}_3$ ,<br>$\delta_{\text{H}}$ (mult. $J$ in Hz) | $\Delta\delta^*$<br>(ppm) |
|----------|------------------------------------------------------------------------------|--------------------------------------------------------------------------------|---------------------------|
| 1        | 2.72 (s)                                                                     | 2.71 (s)                                                                       | 0.01                      |
| 2        | --                                                                           | --                                                                             | --                        |
| 3        | --                                                                           | --                                                                             | --                        |
| 4        | 4.48 (t, 6.13)                                                               | 4.49 (t, 6.0)                                                                  | -0.01                     |
| 5        | 2.94 (t, 6.0)                                                                | 2.94 (t, 6.0)                                                                  | 0.00                      |
| 6        | --                                                                           | --                                                                             | --                        |
| 7        | --                                                                           | --                                                                             | --                        |
| 8        | 7.79 (s)                                                                     | 7.78 (s)                                                                       | 0.01                      |
| 9        | --                                                                           | --                                                                             | --                        |
| 10       | 2.77 (s)                                                                     | 2.76 (s)                                                                       | 0.01                      |
| 11       | --                                                                           | --                                                                             | --                        |
| 12       | 1.16 (s)                                                                     | 1.15 (s)                                                                       | 0.01                      |
| 13       | 1.16 (s)                                                                     | 1.15 (s)                                                                       | 0.01                      |
| 14       | --                                                                           | --                                                                             | --                        |
| 15       | 2.18 (s)                                                                     | 2.18 (s)                                                                       | 0.00                      |

\* The chemical shift of natural product minus the chemical shift of synthetic product.

**Table S2. Comparison of  $^{13}\text{C}$  NMR data of natural granulolactone (1)<sup>[6]</sup> (100 MHz)  
with those of synthetic granulolactone (1) (100 MHz)**

| Position | Natural, 100 MHz, $\text{CDCl}_3$ ,<br>$\delta_{\text{C}}$ (ppm) | Synthetic, 100 MHz, $\text{CDCl}_3$ ,<br>$\delta_{\text{C}}$ (ppm) | $\Delta\delta^*$<br>(ppm) |
|----------|------------------------------------------------------------------|--------------------------------------------------------------------|---------------------------|
| 1        | 47.3                                                             | 47.3                                                               | 0.0                       |
| 2        | 149.3                                                            | 149.5                                                              | -0.2                      |
| 3        | 130.7                                                            | 130.9                                                              | -0.2                      |
| 4        | 66.7                                                             | 66.9                                                               | -0.2                      |
| 5        | 25.2                                                             | 25.2                                                               | 0.0                       |
| 6        | 136.2                                                            | 136.3                                                              | -0.1                      |
| 7        | 123.6                                                            | 123.6                                                              | 0.0                       |
| 8        | 124.2                                                            | 124.3                                                              | -0.1                      |
| 9        | 142.5                                                            | 142.6                                                              | -0.1                      |
| 10       | 47.6                                                             | 47.6                                                               | 0.0                       |
| 11       | 39.7                                                             | 39.8                                                               | -0.1                      |
| 12       | 28.9                                                             | 29.0                                                               | -0.1                      |
| 13       | 28.9                                                             | 29.0                                                               | -0.1                      |
| 14       | 166.2                                                            | 166.4                                                              | -0.2                      |
| 15       | 15.3                                                             | 15.4                                                               | -0.1                      |

\* The chemical shift of natural product minus the chemical shift of synthetic product.

**Table S3. Comparison of  $^1\text{H}$  NMR data of natural echinolactone A (2)<sup>[7]</sup> (400 MHz) with those of synthetic echinolactone A (2) (600 MHz)**

| Position | Natural, 400 MHz, $\text{CDCl}_3$ ,<br>$\delta_{\text{H}}$ (mult. $J$ in Hz) | Synthetic, 600 MHz, $\text{CDCl}_3$ ,<br>$\delta_{\text{H}}$ (mult. $J$ in Hz) | $\Delta\delta^*$<br>(ppm) |
|----------|------------------------------------------------------------------------------|--------------------------------------------------------------------------------|---------------------------|
| 1        | 2.96 (s)                                                                     | 2.96 (s)                                                                       | 0.00                      |
| 2        | --                                                                           | --                                                                             | --                        |
| 3        | --                                                                           | --                                                                             | --                        |
| 4        | --                                                                           | --                                                                             | --                        |
| 5        | 3.08 (t, 5.9)                                                                | 3.07 (t, 6.0)                                                                  | 0.01                      |
| 6        | 4.52 (t, 5.9)                                                                | 4.53 (t, 6.0)                                                                  | -0.01                     |
| 7        | --                                                                           | --                                                                             | --                        |
| 8        | --                                                                           | --                                                                             | --                        |
| 9        | 8.42 (s)                                                                     | 8.41 (s)                                                                       | 0.01                      |
| 10       | --                                                                           | --                                                                             | --                        |
| 11       | --                                                                           | --                                                                             | --                        |
| 12       | --                                                                           | --                                                                             | --                        |
| 13       | 2.30 (s)                                                                     | 2.30 (s)                                                                       | 0.00                      |
| 14       | 1.25 (s)                                                                     | 1.25 (s)                                                                       | 0.00                      |
| 15       | 1.25 (s)                                                                     | 1.25 (s)                                                                       | 0.00                      |

\* The chemical shift of natural product minus the chemical shift of synthetic product.

**Table S4. Comparison of  $^{13}\text{C}$  NMR data of natural echinolactone A (2)<sup>[7]</sup> (100 MHz) with those of synthetic echinolactone A (2) (100 MHz)**

| Position | Natural, 100 MHz, $\text{CDCl}_3$ ,<br>$\delta_{\text{C}}$ (ppm) | Synthetic, 100 MHz, $\text{CDCl}_3$ ,<br>$\delta_{\text{C}}$ (ppm) | $\Delta\delta^*$<br>(ppm) |
|----------|------------------------------------------------------------------|--------------------------------------------------------------------|---------------------------|
| 1        | 42.6                                                             | 42.6                                                               | 0.0                       |
| 2        | 155.8                                                            | 155.9                                                              | -0.1                      |
| 3        | 133.1                                                            | 133.2                                                              | -0.1                      |
| 4        | 143.7                                                            | 144.0                                                              | -0.3                      |
| 5        | 25.3                                                             | 25.9                                                               | -0.6                      |
| 6        | 66.2                                                             | 66.4                                                               | -0.2                      |
| 7        | 165.0                                                            | 165.0                                                              | 0.0                       |
| 8        | 125.5                                                            | 125.5                                                              | 0.0                       |
| 9        | 125.1                                                            | 125.0                                                              | 0.1                       |
| 10       | 134.2                                                            | 134.4                                                              | -0.2                      |
| 11       | 209.8                                                            | 210.2                                                              | -0.4                      |
| 12       | 45.2                                                             | 45.7                                                               | -0.5                      |
| 13       | 14.8                                                             | 14.3                                                               | -0.5                      |
| 14       | 25.1                                                             | 25.4                                                               | -0.3                      |
| 15       | 25.1                                                             | 25.4                                                               | -0.3                      |

\* The chemical shift of natural product minus the chemical shift of synthetic product.

**Table S5. Comparison of  $^1\text{H}$  NMR data of natural ( $\pm$ )-radulactone (**3**)<sup>[8]</sup> (500 MHz) with those of synthetic ( $\pm$ )-radulactone (**3**) (600 MHz)**

| Position   | Natural, 500 MHz, $\text{CDCl}_3$ ,<br>$\delta_{\text{H}}$ (mult. $J$ in Hz) | Synthetic, 600 MHz, $\text{CDCl}_3$ ,<br>$\delta_{\text{H}}$ (mult. $J$ in Hz) | $\Delta\delta^*$<br>(ppm) |
|------------|------------------------------------------------------------------------------|--------------------------------------------------------------------------------|---------------------------|
| 1 $\alpha$ | 2.62 (d, 16.3)                                                               | 2.63 (d, 16.2)                                                                 | -0.01                     |
| 1 $\beta$  | 2.79 (d, 16.3)                                                               | 2.80 (d, 16.2)                                                                 | -0.01                     |
| 2          | --                                                                           | --                                                                             | --                        |
| 3          | --                                                                           | --                                                                             | --                        |
| 4          | 4.48 (t, 5.9)                                                                | 4.50 (t, 6.0)                                                                  | -0.02                     |
| 5          | 2.96 (d, 5.9)                                                                | 2.97 (d, 6.0)                                                                  | -0.01                     |
| 6          | --                                                                           | --                                                                             | --                        |
| 7          | --                                                                           | --                                                                             | --                        |
| 8          | 7.99 (s)                                                                     | 8.01 (s)                                                                       | -0.02                     |
| 9          | --                                                                           | --                                                                             | --                        |
| 10         | 4.69 (s)                                                                     | 4.70 (s)                                                                       | -0.01                     |
| 11         | --                                                                           | --                                                                             | --                        |
| 12         | 2.18 (s)                                                                     | 2.20 (s)                                                                       | -0.02                     |
| 13         | --                                                                           | --                                                                             | --                        |
| 14         | 1.05 (s)                                                                     | 1.06 (s)                                                                       | -0.01                     |
| 15         | 1.17 (s)                                                                     | 1.18 (s)                                                                       | -0.01                     |

\* The chemical shift of natural product minus the chemical shift of synthetic product.



**Table S6. Comparison of  $^{13}\text{C}$  NMR data of natural ( $\pm$ )-radulactone (3)<sup>[8]</sup> (100 MHz)  
with those of synthetic ( $\pm$ )-radulactone (3) (100 MHz)**

| Position | Natural, 125 MHz, $\text{CDCl}_3$ ,<br>$\delta_{\text{C}}$ (ppm) | Synthetic, 100 MHz, $\text{CDCl}_3$ ,<br>$\delta_{\text{C}}$ (ppm) | $\Delta\delta^*$<br>(ppm) |
|----------|------------------------------------------------------------------|--------------------------------------------------------------------|---------------------------|
| 1        | 44.2                                                             | 44.4                                                               | -0.2                      |
| 2        | 147.4                                                            | 147.6                                                              | -0.2                      |
| 3        | 131.3                                                            | 131.4                                                              | -0.1                      |
| 4        | 66.6                                                             | 66.8                                                               | -0.2                      |
| 5        | 25.2                                                             | 25.4                                                               | -0.2                      |
| 6        | 138.2                                                            | 138.3                                                              | -0.1                      |
| 7        | 124.2                                                            | 124.4                                                              | -0.2                      |
| 8        | 124.2                                                            | 124.4                                                              | -0.2                      |
| 9        | 143.8                                                            | 143.9                                                              | -0.1                      |
| 10       | 83.0                                                             | 83.2                                                               | -0.2                      |
| 11       | 44.1                                                             | 44.3                                                               | -0.2                      |
| 12       | 14.9                                                             | 15.1                                                               | -0.2                      |
| 13       | 165.9                                                            | 166.0                                                              | -0.1                      |
| 14       | 21.5                                                             | 21.6                                                               | -0.1                      |
| 15       | 26.8                                                             | 26.9                                                               | -0.1                      |

\* The chemical shift of natural product minus the chemical shift of synthetic product.

**Table S7. Comparison of  $^1\text{H}$  NMR data of natural riparol B (4)<sup>[9]</sup> (500 MHz) with those of synthetic riparol B (4) (600 MHz)**

| Position    | Natural, 500 MHz, $\text{CDCl}_3$ ,<br>$\delta_{\text{H}}$ (mult. $J$ in Hz) | Synthetic, 600 MHz, $\text{CDCl}_3$ ,<br>$\delta_{\text{H}}$ (mult. $J$ in Hz) | $\Delta\delta^*$<br>(ppm) |
|-------------|------------------------------------------------------------------------------|--------------------------------------------------------------------------------|---------------------------|
| 1 $\alpha$  | 2.68 (s)                                                                     | 2.67 (s)                                                                       | 0.01                      |
| 1 $\beta$   | 2.68 (s)                                                                     | 2.67 (s)                                                                       | 0.01                      |
| 2           | --                                                                           | --                                                                             | --                        |
| 3           | --                                                                           | --                                                                             | --                        |
| 4 $\alpha$  | 3.86 (t, 5.9)                                                                | 3.86 (t, 6.0)                                                                  | 0.00                      |
| 4 $\beta$   | 3.86 (t, 5.9)                                                                | 3.86 (t, 6.0)                                                                  | 0.00                      |
| 5 $\alpha$  | 3.03 (t, 5.9)                                                                | 3.02 (t, 6.0)                                                                  | 0.01                      |
| 5 $\beta$   | 3.03 (t, 5.9)                                                                | 3.02 (t, 6.0)                                                                  | 0.01                      |
| 6           | --                                                                           | --                                                                             | --                        |
| 7           | --                                                                           | --                                                                             | --                        |
| 8           | 7.01 (s)                                                                     | 7.01 (s)                                                                       | 0.00                      |
| 9           | --                                                                           | --                                                                             | --                        |
| 10 $\alpha$ | 2.73 (s)                                                                     | 2.72 (s)                                                                       | 0.01                      |
| 10 $\beta$  | 2.73 (s)                                                                     | 2.72 (s)                                                                       | 0.01                      |
| 11          | --                                                                           | --                                                                             | --                        |
| 12          | 1.16 (s)                                                                     | 1.15 (s)                                                                       | 0.01                      |
| 13          | 1.16 (s)                                                                     | 1.15 (s)                                                                       | 0.01                      |
| 14          | 4.62 (s)                                                                     | 4.61 (s)                                                                       | 0.01                      |
| 15          | 2.21 (s)                                                                     | 2.20 (s)                                                                       | 0.01                      |

\* The chemical shift of natural product minus the chemical shift of synthetic product.

**Table S8. Comparison of  $^{13}\text{C}$  NMR data of natural riparol B (4)<sup>[9]</sup> (125 MHz) with those of synthetic riparol B (4) (100 MHz)**

| Position | Natural, 125 MHz, $\text{CDCl}_3$ ,<br>$\delta_{\text{C}}$ (ppm) | Synthetic, 100 MHz, $\text{CDCl}_3$ ,<br>$\delta_{\text{C}}$ (ppm) | $\Delta\delta^*$<br>(ppm) |
|----------|------------------------------------------------------------------|--------------------------------------------------------------------|---------------------------|
| 1        | 47.3                                                             | 47.4                                                               | -0.1                      |
| 2        | 143.4                                                            | 143.6                                                              | -0.2                      |
| 3        | 133.1                                                            | 133.2                                                              | -0.1                      |
| 4        | 61.7                                                             | 61.8                                                               | -0.1                      |
| 5        | 31.6                                                             | 31.8                                                               | -0.2                      |
| 6        | 133.3                                                            | 133.4                                                              | -0.1                      |
| 7        | 137.9                                                            | 138.1                                                              | -0.2                      |
| 8        | 124.0                                                            | 124.2                                                              | -0.2                      |
| 9        | 141.6                                                            | 141.7                                                              | -0.1                      |
| 10       | 47.8                                                             | 48.0                                                               | -0.2                      |
| 11       | 39.3                                                             | 39.5                                                               | -0.2                      |
| 12       | 29.2                                                             | 29.4                                                               | -0.2                      |
| 13       | 29.2                                                             | 29.4                                                               | -0.2                      |
| 14       | 64.3                                                             | 64.5                                                               | -0.2                      |
| 15       | 16.0                                                             | 16.2                                                               | -0.2                      |

\* The chemical shift of natural product minus the chemical shift of synthetic product.

## X-Ray Crystallographic Data for echinolactone A (2)

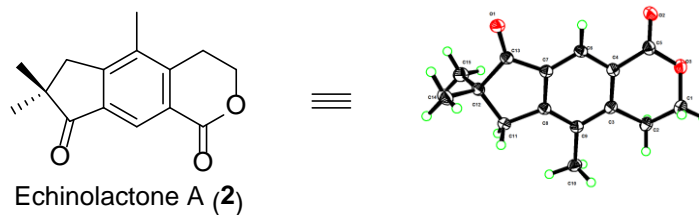

**Table S9. Crystal data and structure refinement for echinolactone A (CCDC 1940530).**

|                                  |                                                |
|----------------------------------|------------------------------------------------|
| Identification code              | 0613ZBDX1_0m                                   |
| Empirical formula                | C <sub>15</sub> H <sub>16</sub> O <sub>3</sub> |
| Formula weight                   | 244.28                                         |
| Temperature/K                    | 100.0                                          |
| Crystal system                   | monoclinic                                     |
| Space group                      | P2 <sub>1</sub> /c                             |
| a/Å                              | 8.9313(4)                                      |
| b/Å                              | 11.1597(5)                                     |
| c/Å                              | 12.1608(6)                                     |
| $\alpha$ /°                      | 90                                             |
| $\beta$ /°                       | 97.7090(10)                                    |
| $\gamma$ /°                      | 90                                             |
| Volume/Å <sup>3</sup>            | 1201.12(10)                                    |
| Z                                | 4                                              |
| $\rho_{\text{calc}}/\text{cm}^3$ | 1.351                                          |
| $\mu/\text{mm}^{-1}$             | 0.756                                          |
| F(000)                           | 520.0                                          |
| Crystal size/mm <sup>3</sup>     | 0.19 × 0.15 × 0.12                             |

|                                                  |                                                                    |
|--------------------------------------------------|--------------------------------------------------------------------|
| Radiation                                        | CuK $\alpha$ ( $\lambda$ = 1.54178)                                |
| 2 $\Theta$ range for data collection/ $^{\circ}$ | 9.994 to 149.322                                                   |
| Index ranges                                     | $-11 \leq h \leq 10$ , $-13 \leq k \leq 13$ , $-15 \leq l \leq 15$ |
| Reflections collected                            | 14173                                                              |
| Independent reflections                          | 2427 [ $R_{\text{int}}$ = 0.0496, $R_{\text{sigma}}$ = 0.0315]     |
| Data/restraints/parameters                       | 2427/0/166                                                         |
| Goodness-of-fit on $F^2$                         | 1.108                                                              |
| Final R indexes [ $I \geq 2\sigma(I)$ ]          | $R_1$ = 0.0435, $wR_2$ = 0.1249                                    |
| Final R indexes [all data]                       | $R_1$ = 0.0445, $wR_2$ = 0.1260                                    |
| Largest diff. peak/hole / e $\text{\AA}^{-3}$    | 0.51/-0.42                                                         |

**Table S10. Bond Lengths for echinolactone A (CCDC 1940530).**

| Atom | Atom | Length/ $\text{\AA}$ | Atom | Atom | Length/ $\text{\AA}$ |
|------|------|----------------------|------|------|----------------------|
| O1   | C13  | 1.2190(15)           | C12  | C11  | 1.5432(17)           |
| O3   | C1   | 1.4554(15)           | C12  | C15  | 1.5351(18)           |
| O3   | C5   | 1.3472(16)           | C12  | C14  | 1.5271(17)           |
| O2   | C5   | 1.2095(16)           | C9   | C8   | 1.3982(17)           |
| C13  | C12  | 1.5322(16)           | C9   | C3   | 1.4048(17)           |
| C13  | C7   | 1.4762(17)           | C9   | C10  | 1.5085(16)           |
| C4   | C6   | 1.3880(18)           | C8   | C7   | 1.3947(16)           |
| C4   | C3   | 1.4098(17)           | C8   | C11  | 1.5125(17)           |
| C4   | C5   | 1.4913(17)           | C3   | C2   | 1.5067(17)           |
| C6   | C7   | 1.3873(17)           | C1   | C2   | 1.5096(18)           |

**Table S11. Bond Angles for echinolactone A (CCDC 1940530).**

| Atom | Atom | Atom | Angle/°    | Atom | Atom | Atom | Angle/°    |
|------|------|------|------------|------|------|------|------------|
| C5   | O3   | C1   | 117.00(10) | C3   | C9   | C10  | 121.32(11) |
| O1   | C13  | C12  | 125.31(11) | C9   | C8   | C11  | 128.17(11) |
| O1   | C13  | C7   | 126.61(11) | C7   | C8   | C9   | 120.94(11) |
| C7   | C13  | C12  | 108.07(10) | C7   | C8   | C11  | 110.87(11) |
| C6   | C4   | C3   | 121.16(11) | C4   | C3   | C2   | 117.22(11) |
| C6   | C4   | C5   | 117.77(11) | C9   | C3   | C4   | 120.73(11) |
| C3   | C4   | C5   | 120.98(11) | C9   | C3   | C2   | 122.05(11) |
| C7   | C6   | C4   | 117.80(11) | C6   | C7   | C13  | 128.50(11) |
| C13  | C12  | C11  | 104.42(10) | C6   | C7   | C8   | 121.86(11) |
| C13  | C12  | C15  | 107.07(10) | C8   | C7   | C13  | 109.64(10) |
| C15  | C12  | C11  | 110.37(10) | O3   | C1   | C2   | 111.74(10) |
| C14  | C12  | C13  | 110.48(10) | C8   | C11  | C12  | 105.32(9)  |
| C14  | C12  | C11  | 114.34(10) | O3   | C5   | C4   | 118.11(11) |
| C14  | C12  | C15  | 109.81(11) | O2   | C5   | O3   | 118.80(11) |
| C8   | C9   | C3   | 117.51(11) | O2   | C5   | C4   | 123.02(12) |
| C8   | C9   | C10  | 121.15(11) | C3   | C2   | C1   | 109.53(10) |

## References:

- [1] (a) Piers, E.; Grierson, J. R.; Lau, C. K.; Nagakura, I. *Can. J. Chem.* **1982**, *60*, 210–223; (b) Lemièrre, G.; Gandon, V.; Cariou, K.; Hours, A.; Fukuyama, T.; Dhimane, A.; Fensterbank L.; Malacria, Max. *J. Am. Chem. Soc.* **2009**, *131*, 2993–3006.
- [2] (a) Hesse, M. J.; Butts, C. P.; Willis, C. L.; Aggarwal, V. K. *Angew. Chem. Int. Ed.* **2012**, *124*, 12612–12616; (b) Brown, C. A.; Aggarwal, V. K. *Chem. Eur. J.* **2015**, *21*, 13900–13903.
- [3] Amans, D.; Bellosta, V.; Cossy, Janine. *Chem. Eur. J.* **2009**, *15*, 3457–3473.
- [4] Zeng, Y.; Zhao, Y.; Zhang, Y. *Chem. Commun.* **2019**, *55*, 4250–4253.
- [5] Zhang, L.; Tang, Y.; Han, Z.; Ding, K. *Angew. Chem. Int. Ed.* **2019**, *58*, 4973–4977.
- [6] Kokubun, T.; Scott-Brown, A.; Kite, G. C.; Simmonds, M. S. J. *J. Nat. Prod.* **2016**, *79*, 1698–1701.
- [7] Suzuki, S.; Murayama, T.; Shiono, Y. *Phytochemistry* **2005**, *66*, 2329–2333.
- [8] Fabian, K.; Lorenzen, K.; Anke, T.; Johansson, M.; Sterner, O. *Z. Naturforsch.* **1998**, *53c*, 939–945.
- [9] Weber, D.; Erosa, G.; Sterner, O.; Anke, T. *Z. Naturforsch., C: J. Biosci.* **2006**, *61*, 663–669.

## Spectra for Compounds

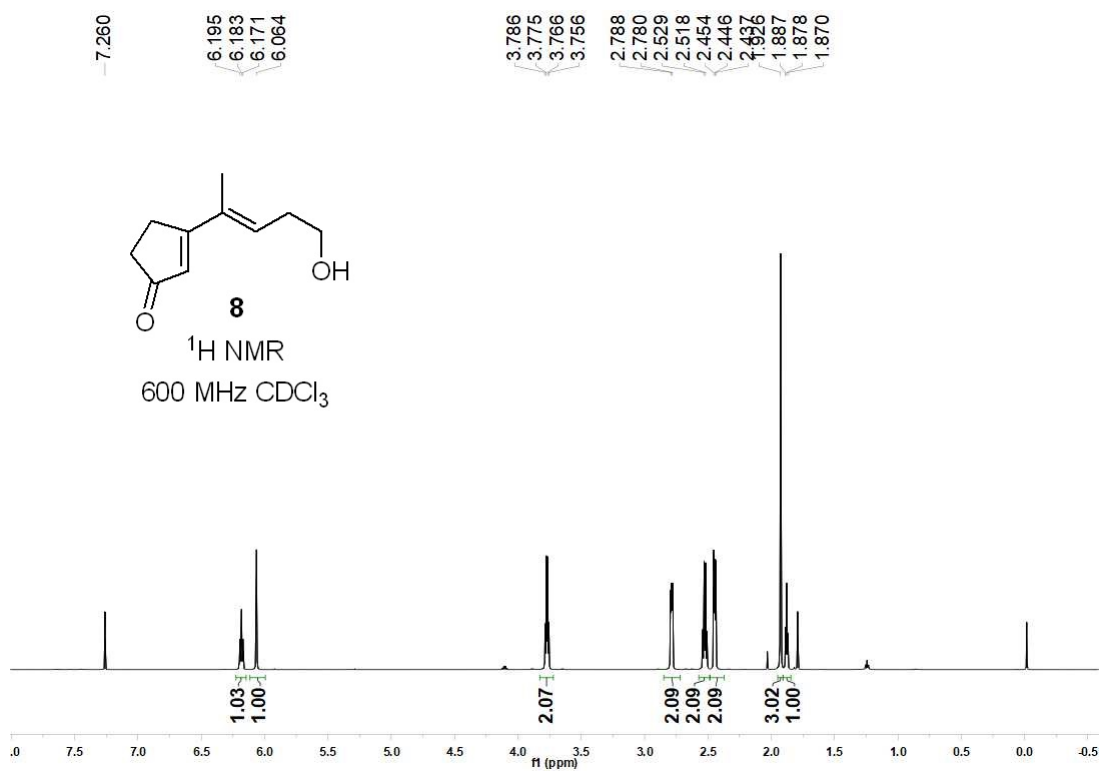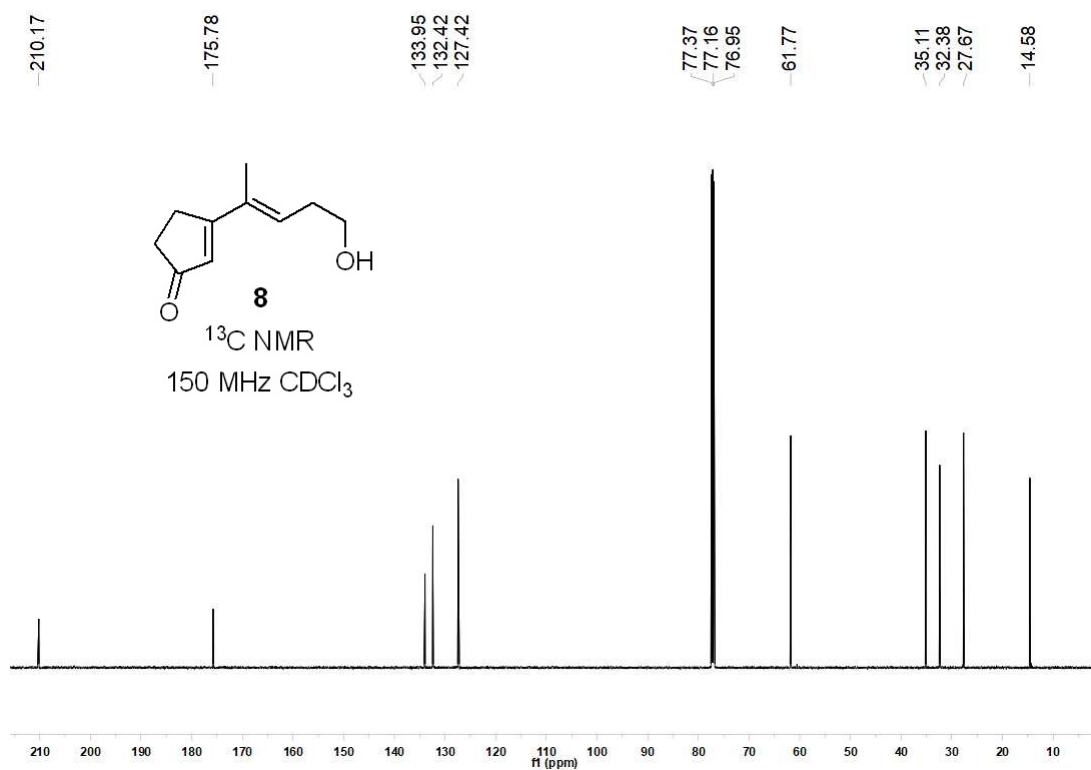



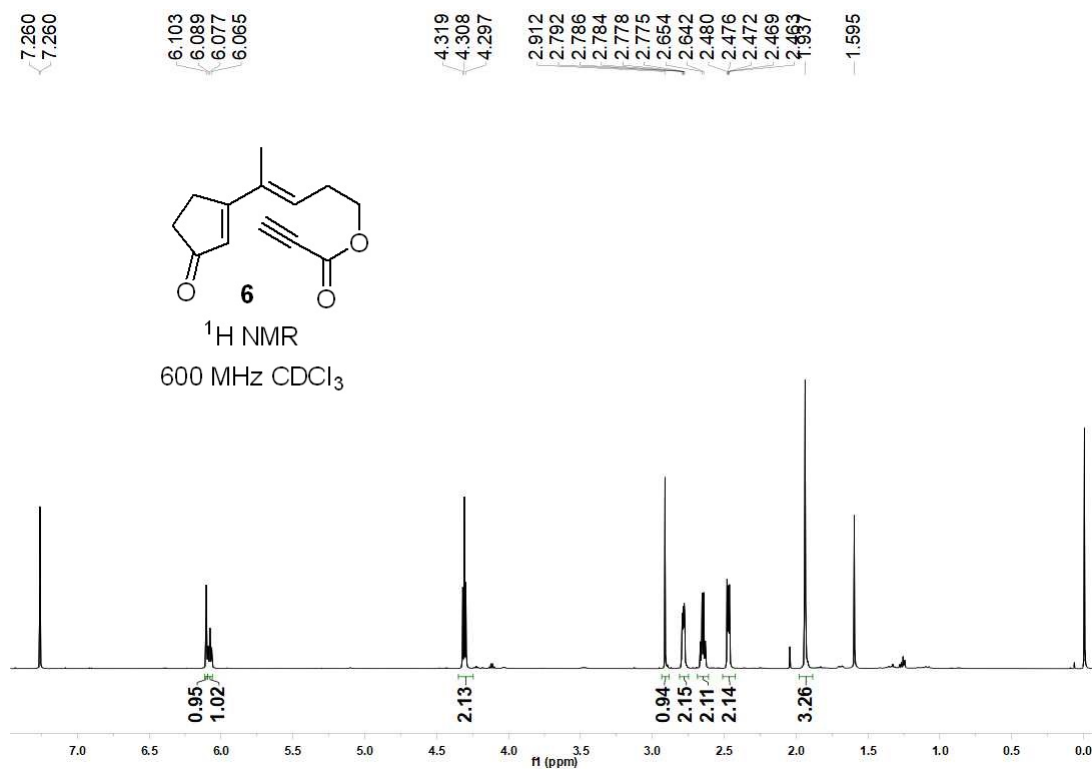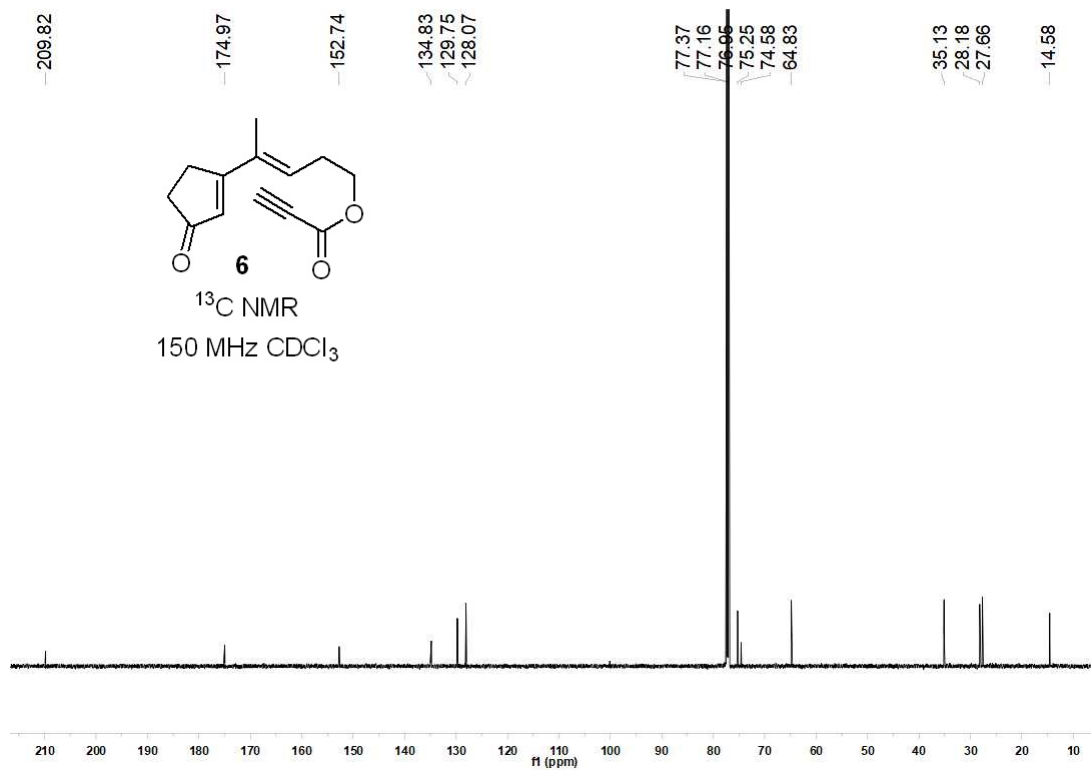

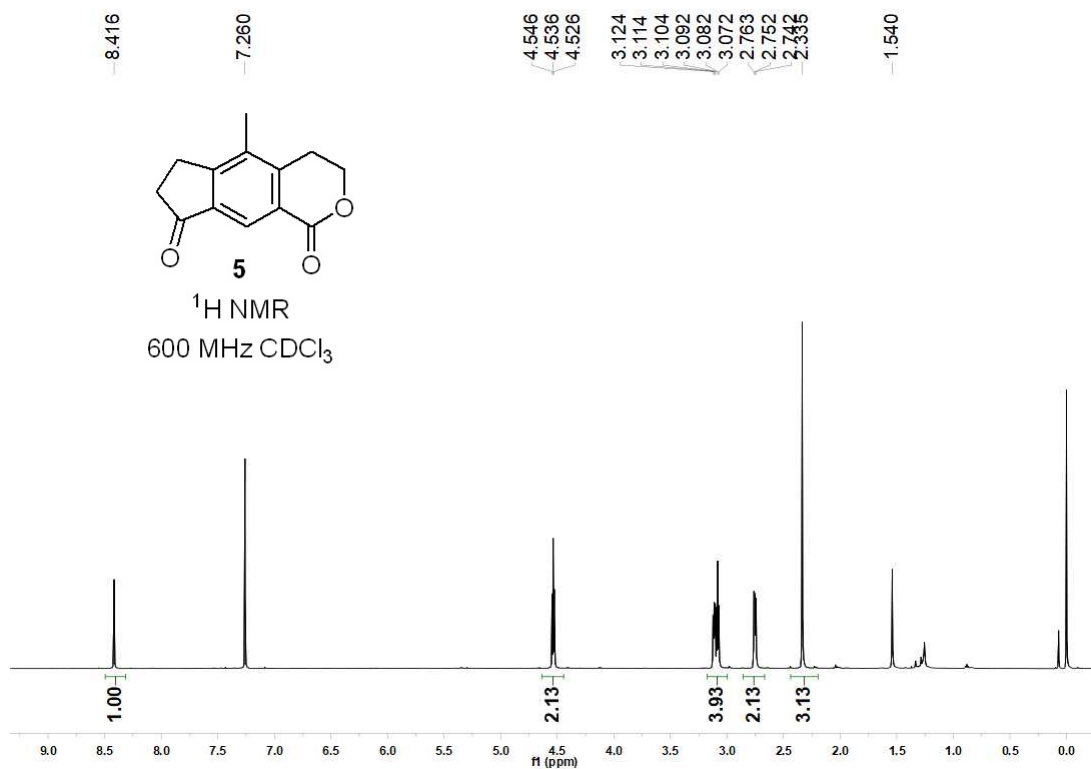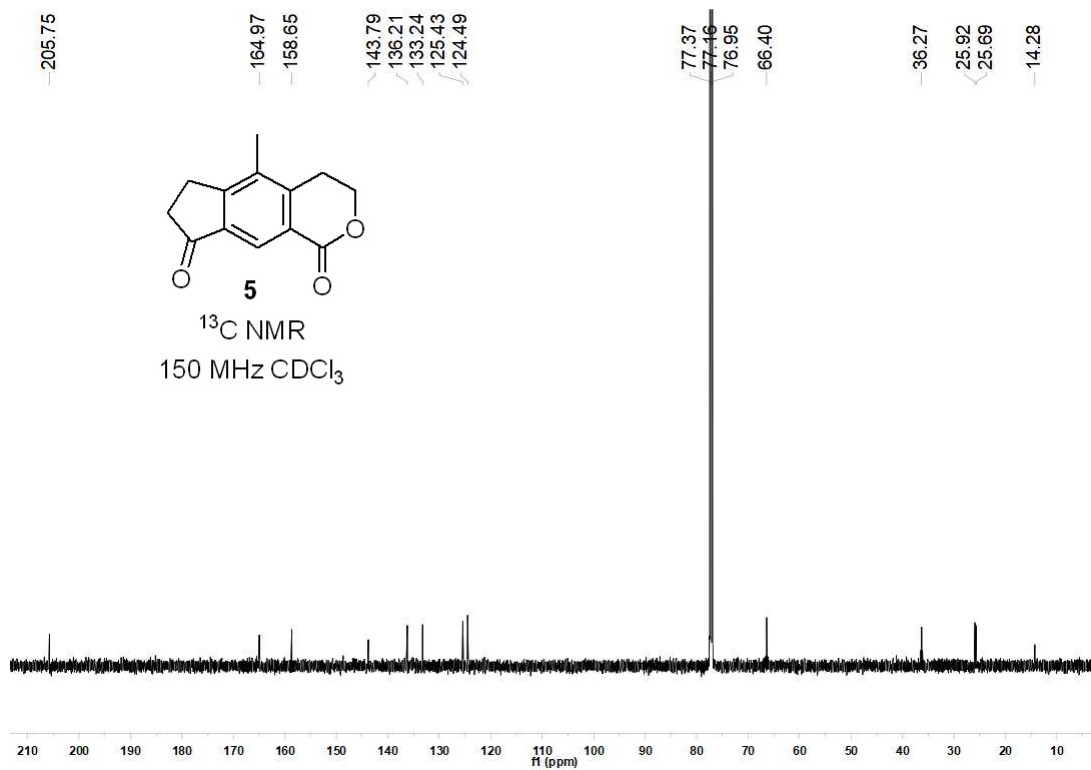

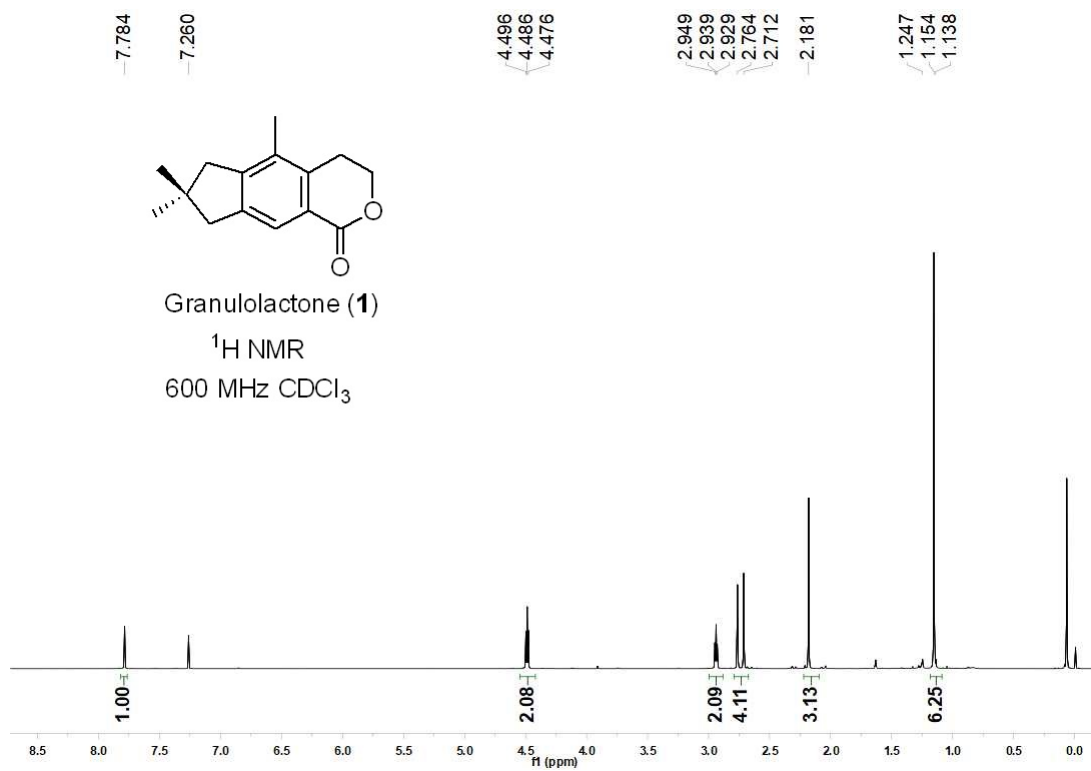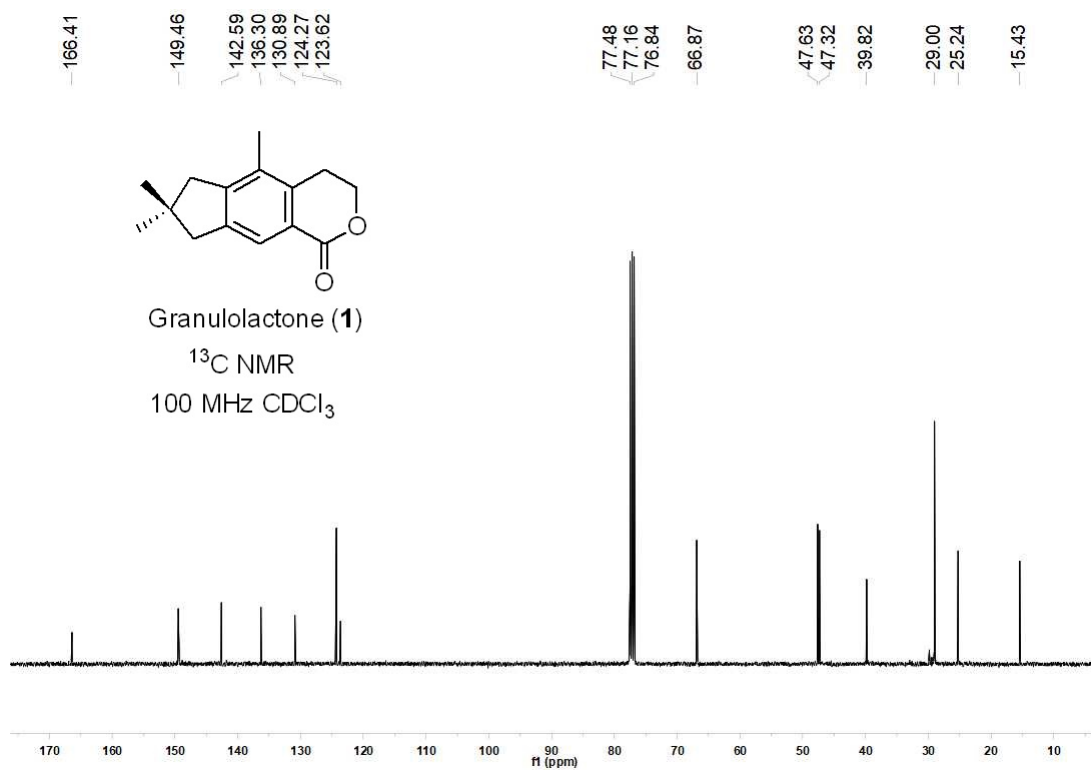

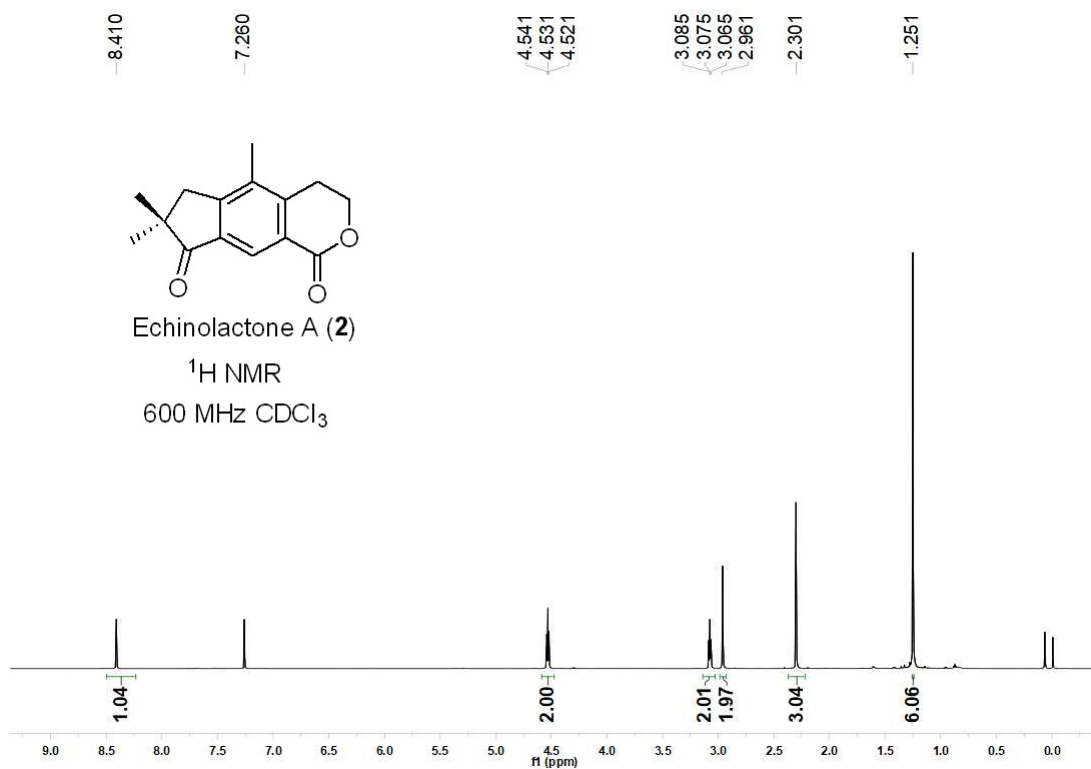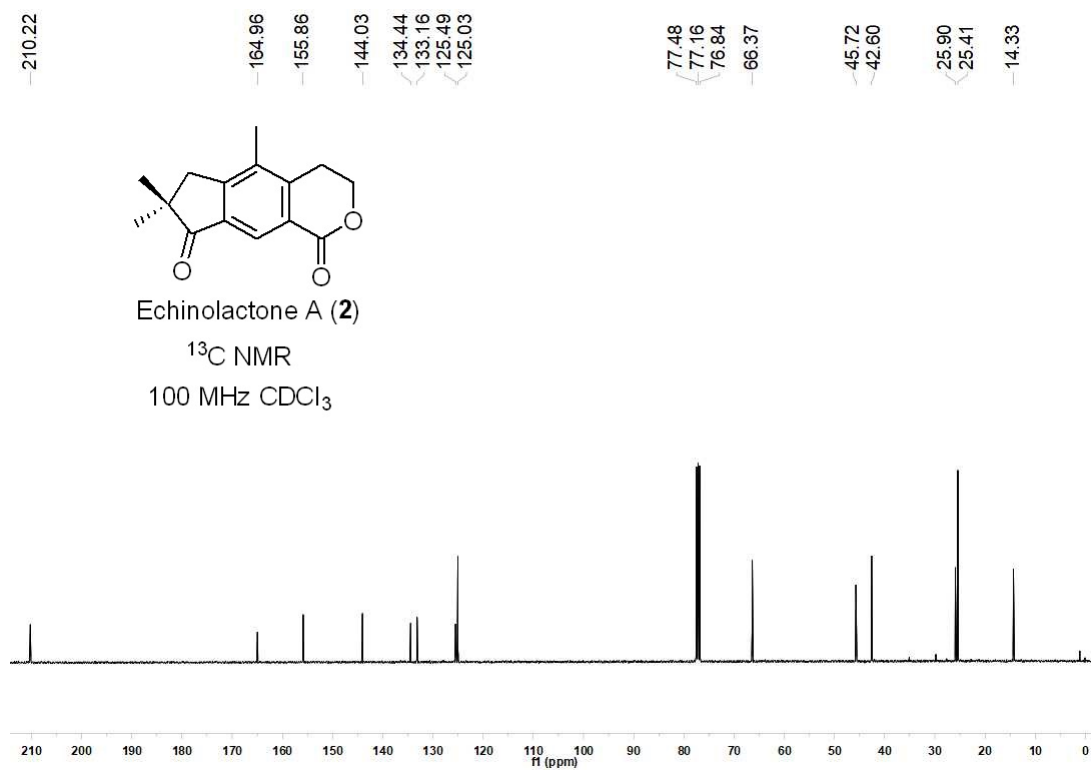

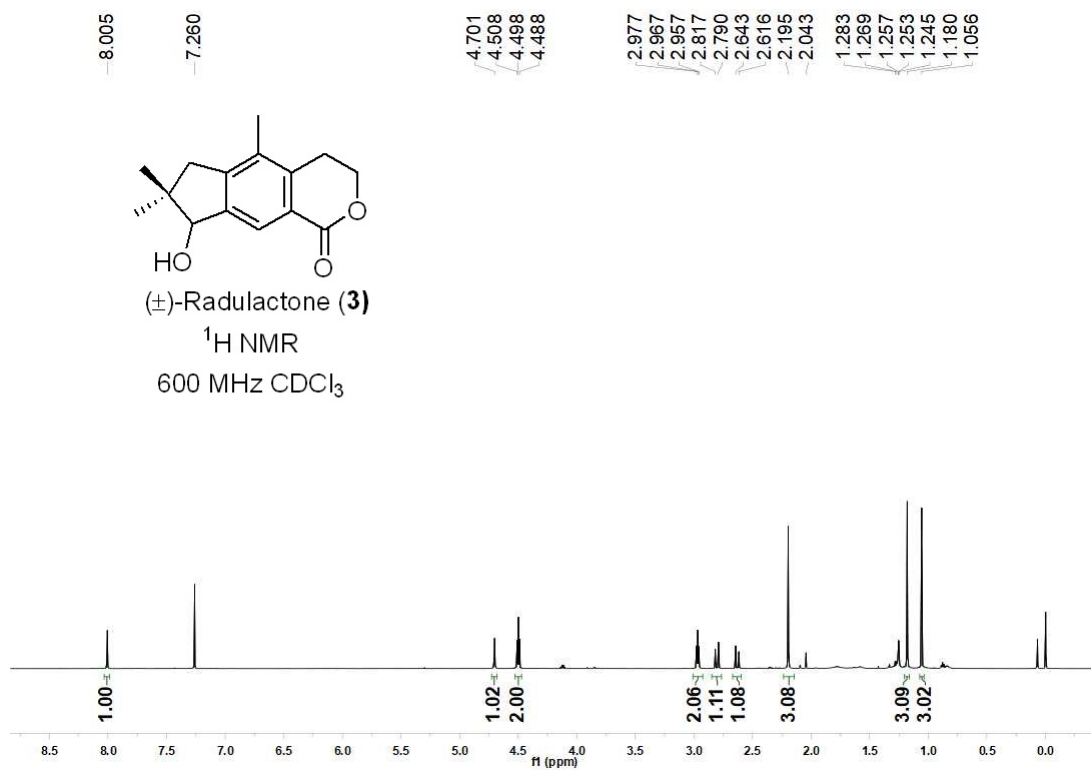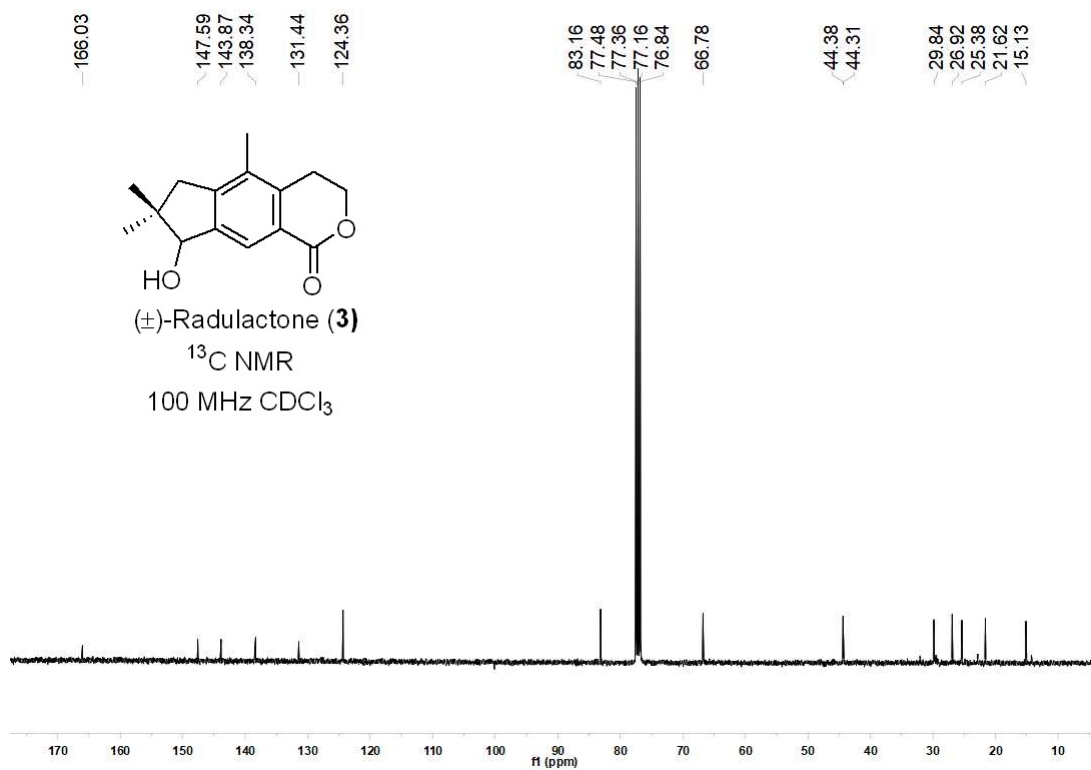

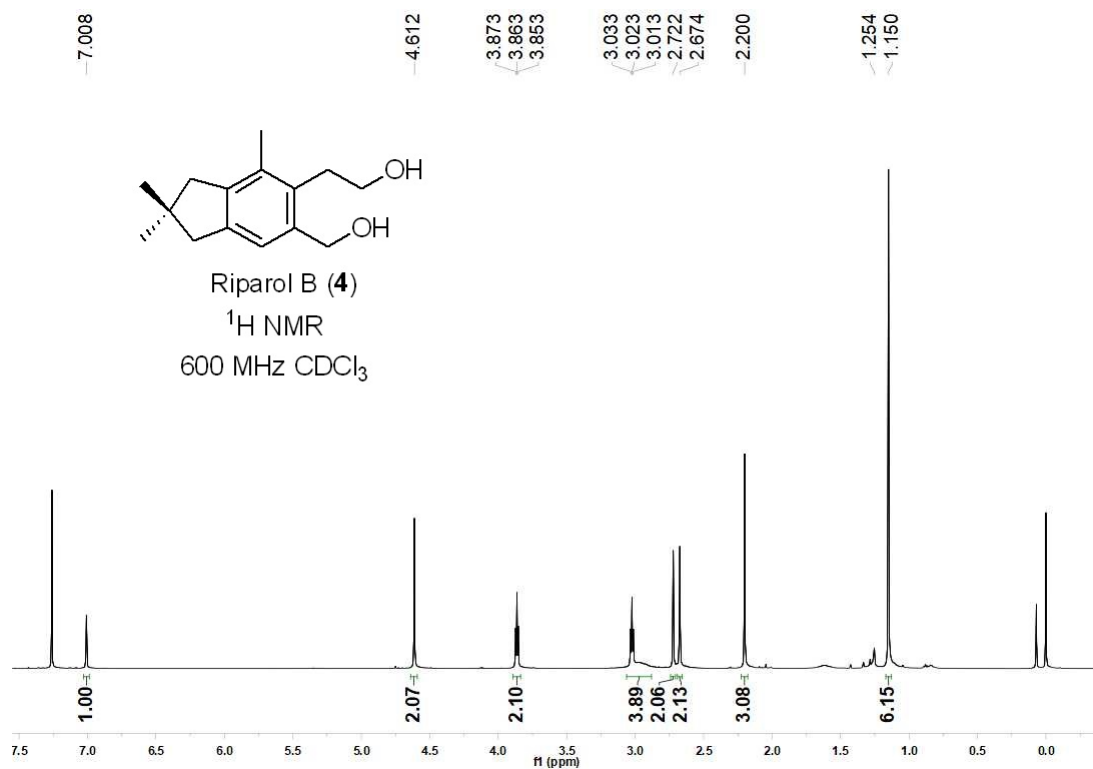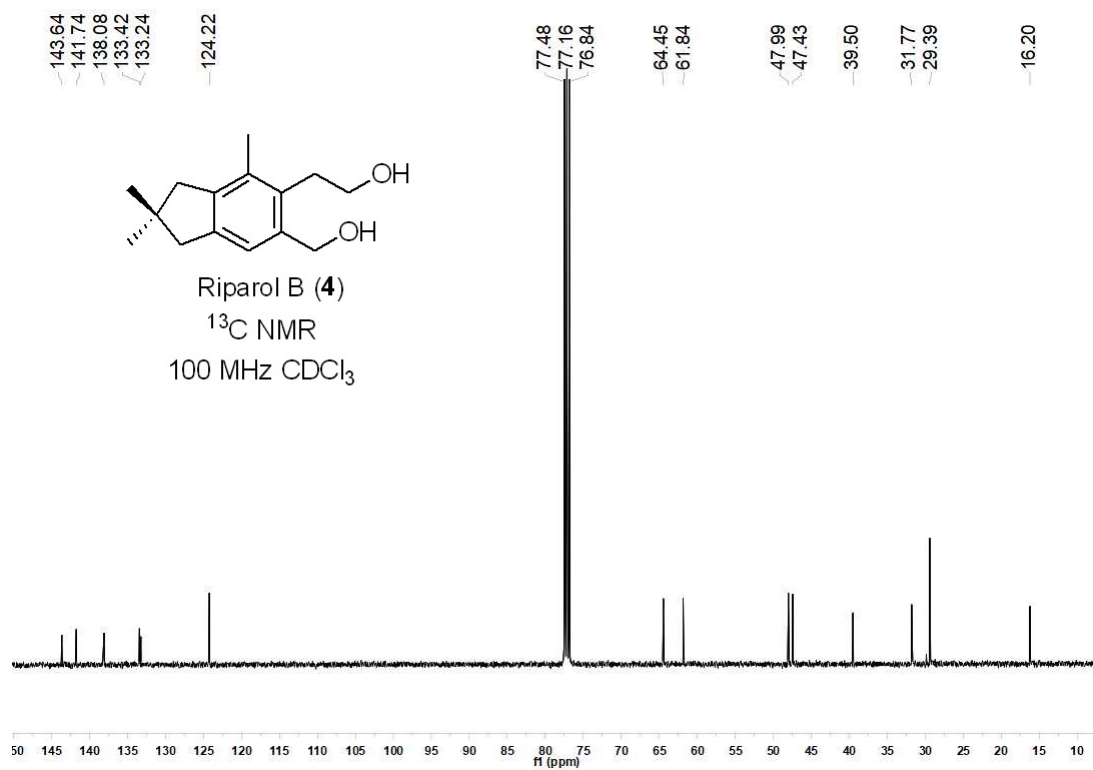

Supplement: Supplementary file 1 [file 17417339]
